# Supplementary material for: Activation of the unfolded protein response and granulovacuolar degeneration are not common features of human prion pathology
Source: PubMed Central journal article supplement (PMC5086055; doi:10.1186/s40478-016-0383-7), 2016-10-28

# Additional file 1: Figure S1

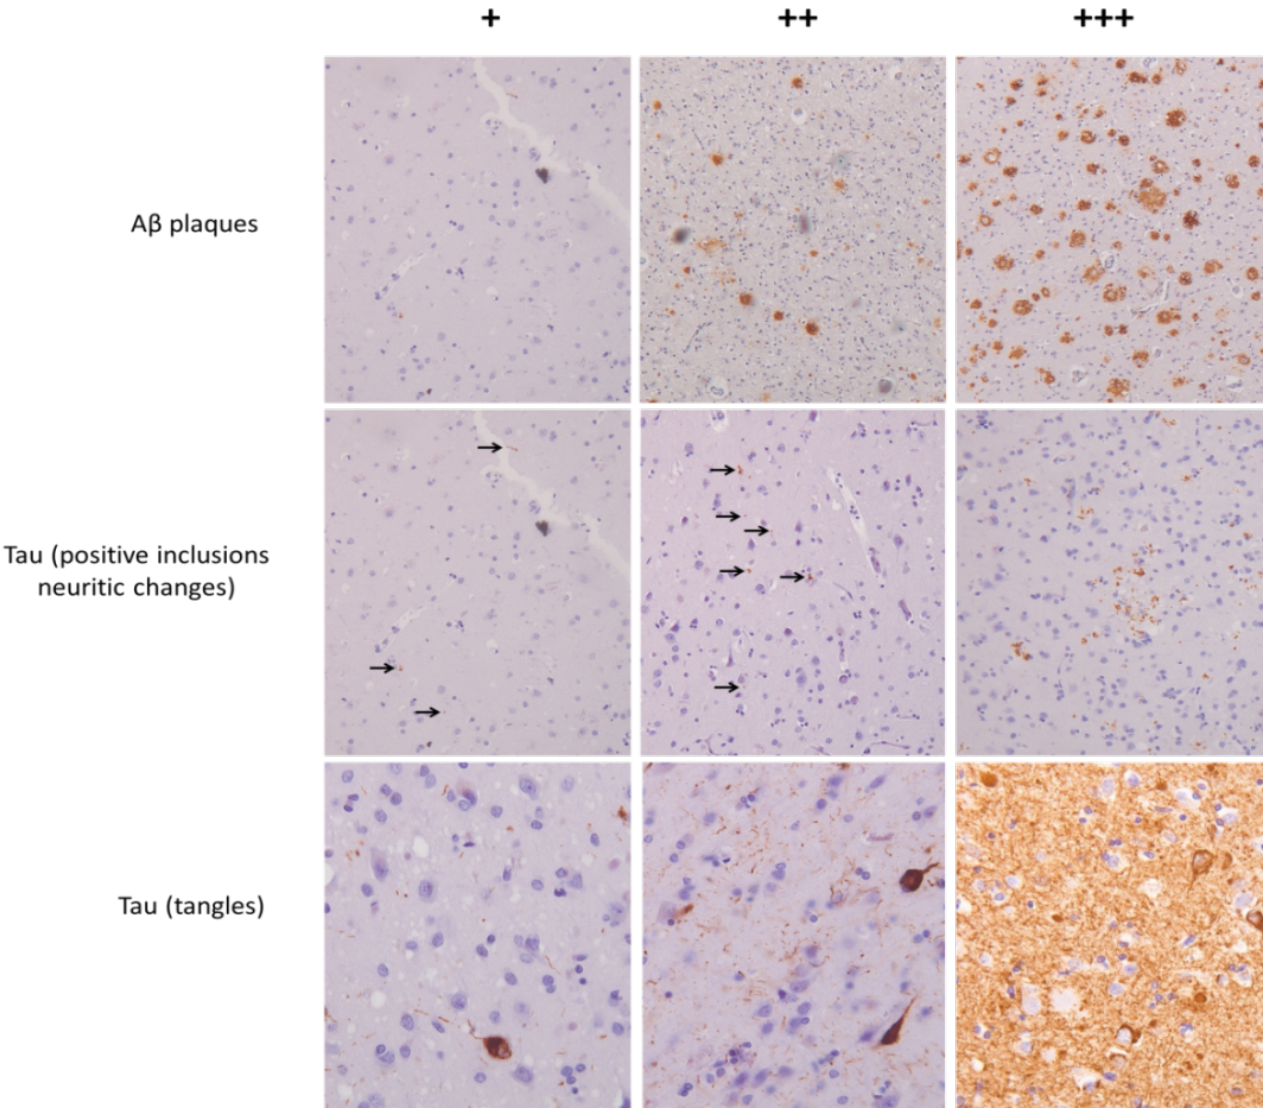

Supplement: 40478_2016_383_MOESM1_ESM.pdf [file 40478_2016_383_MOESM1_ESM.pdf]
